# Supplementary material
Source: publisher site journal article supplement (https://www.dovepress.com/article/320841)
Supplement: Supplementary file 1 [file get_supplementary_file.php]

**Supplementary Table 1. The primers, the restriction enzymes and size of products**

| **Gene** | **SNP** | **Method** | **Primers** | **Annealing temperature** | **Restriction enzyme** | **Digested fragments** | **Ref** |
| --- | --- | --- | --- | --- | --- | --- | --- |
| EPHX1 | rs1051740 | RFLP | 5`- GAT CGA TAA GTT CCG TTT CAC C - 3` | 49OC | *Eco* RV | T allele: 140, 23 bp | [23] |
| 5`- ATC CTT AGT CTT GAA GTG AGG AT - 3` | C allele: 163 bp |
| EPHX1 | rs2234922 | RFLP | 5`- ACA TCC ACT TCA TCC ACG T - 3` | 50OC | *Rsa* I | A allele: 210 bp | [23] |
| 5`- ATG CCT CTG AGA AGC CAT - 3` | G allele: 163, 47 bp |
| GSTP1 | rs1695 | RFLP | 5`- GTA GTT TGC CCA AGG TCA AG - 3` | 50OC | *Bsm* AI | A allele: 328, 105 bp | [24] |
| 5`- AGC CAC CTG AGG GGT AAG - 3` | G allele: 222, 106, 105 bp |
| GSTP1 | rs1138272 | RFLP | 5`- ACA GGA TTT GGT ACT AGC CT - 3` | 54OC | *Aci* I | C allele: 143, 27 bp | [25] |
| 5`- AGT GCC TTC ACA TAG TCA TCC TTG - 3` | T allele: 170 bp |
| GSTM1 | Null | Multiplex PCR | 5`- GAA CTC CCT GAA AAG CTA AAG C - 3` | 53OC | - | Non-null: 219 bp | [24] |
| 5`- GTT GGG CTC AAA TAT ACG GTG G - 3` |
| GSTT1 | Null | 5`- TTC CTT ACT GGT CCT CAC ATC TC - 3` | Non-null: 480 bp |
| 5`- CAG CTG CAT TTG GAA GTG CTC - 3` |
| CHRNA3 | rs1051730 | RFLP | 5’- GCC ATC ATC AAA GCC CCA GGC TT - 3’ | 55OC | *Dra* I | G allele: 176 bp | [26] |
| 5’- GGC AGG TAG AAG ACG AGC AC - 3’ | A allele: 152, 24 bp |
| CHRNA3 | rs12914385 | RFLP | 5’- TTG TAG TTG CTG TTA TAT GC - 3’ | 48OC | *Nsi* I | C allele: 171 bp | - |
| 5’- CAG AAG AAT TGC TTG AAT CTG - 3’ | T allele: 150, 21 bp |
| CHRNA5 | rs16969968 | RFLP | 5’- CGC CTT TGG TCC GCA AGA TA - 3’ | 58OC | *Taq* I | G allele: 290, 145 bp | [27] |
| 5’- TGC TGA TGG GGG AAG TGG AG - 3’ | A allele: 435 bp |
| CHRNA5 | rs17486278 | RFLP | 5’- - 3’ |  | *Mse* I |  |  |
| 5’- - 3’ |  |  |
| SOD3 | rs1799895 | RFLP | 5’- GCG GCA ACC AGG CCA GCG TGG A -3’ | 68OC | *Hae* II | C allele: 92, 33, 20 bp | [28] |
| 5’- TTG CAC TCG CTC TCG CGC CGG C -3’ | G allele: 92, 53 bp |
| SOD3 | rs699473 | RFLP | 5’ - GCC TGA GTG TGT CAT CAC G - 3’ | 65OC | *Nla* III | C allele: 139, 105 bp | [29] |
| 5’ - AGC CAG TGA CCT TCA GCA C - 3’ | T allele: 139, 78, 27 bp |
